# Supplementary material for: Enhanced atmospheric oxidizing capacity in simulating air quality with updated emission inventories for power plants especially for haze periods over East China
Source: Copernicus journal article supplement (doi:10.5194/acp-2017-127), 2017-04-24
Supplement: Supplementary file 1 [file acp-2017-127-supplement.pdf]

Supplement of

# **Enhanced atmospheric oxidizing capacity in simulating air quality with updated online emission inventories for power plants especially for haze periods over East China**

Lei Zhang et al.

*Correspondence to:* Tianliang Zhao (josef\_zhao@126.com) or Shaofei Kong (kongshaofei@cug.edu.cn)

Figure S1. Hourly variations of observed and simulated chemical variable concentrations in the 13 sites (labeled in Fig. 1b).

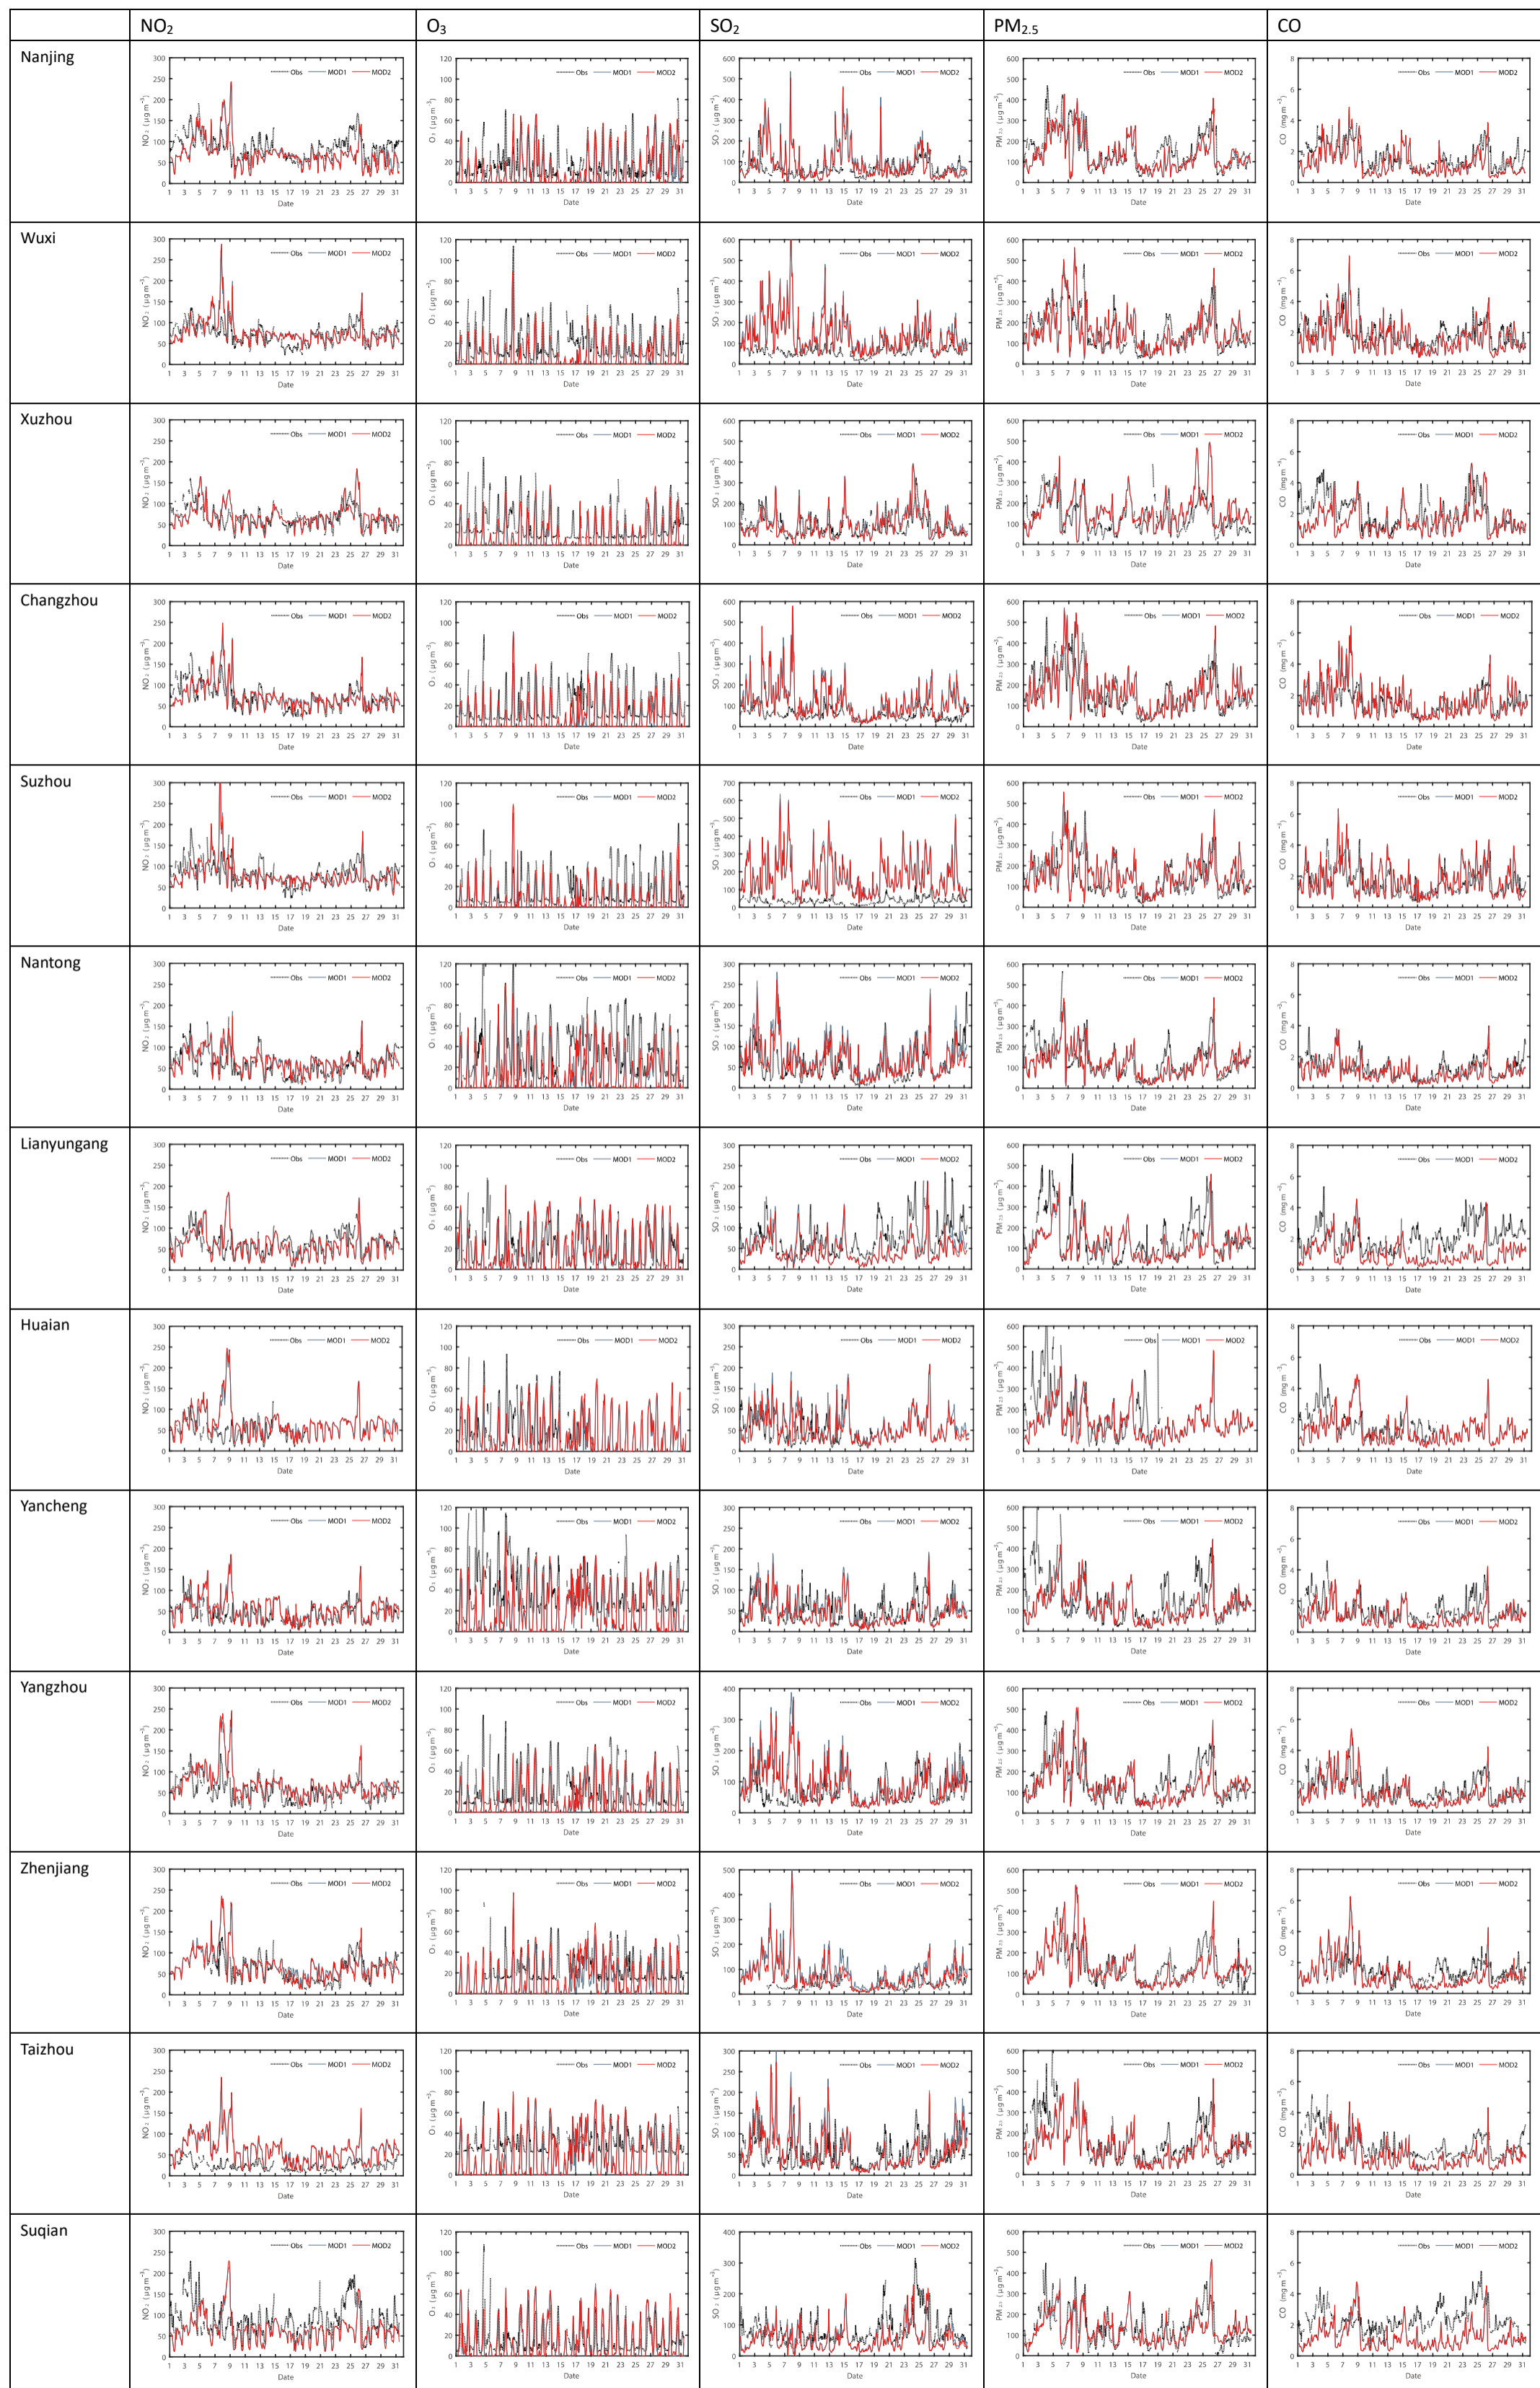

Figure S2. Interdiurnal variations of observed and simulated PM<sub>2.5</sub> chemical composition concentrations at Nanjing site.

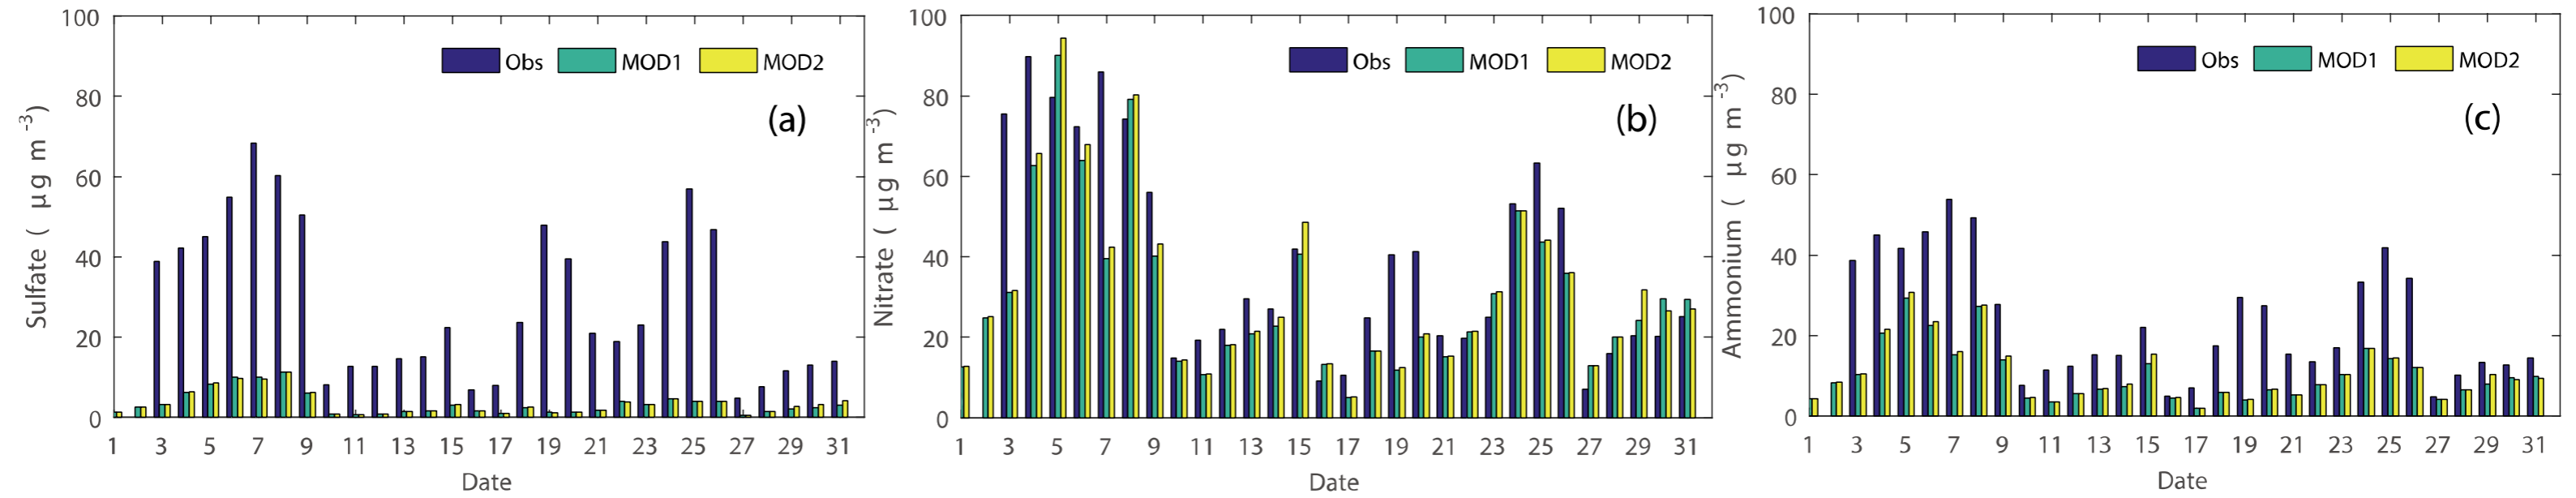

Table S1. Performance statistics of chemical variables between MOD1 and MOD2 during December 2013 in the 13 sites (labeled in Fig. 1b).

|             | NO <sub>2</sub> |        | O <sub>3</sub> |        | SO <sub>2</sub> |        | PM <sub>2.5</sub> |       | CO      |        |         |        |        |        |       |       |        |        |       |       |
|-------------|-----------------|--------|----------------|--------|-----------------|--------|-------------------|-------|---------|--------|---------|--------|--------|--------|-------|-------|--------|--------|-------|-------|
|             | NMB (%)         |        | NME (%)        |        | NMB (%)         |        | NME (%)           |       | NMB (%) |        | NME (%) |        |        |        |       |       |        |        |       |       |
|             | MOD1            | MOD2   | MOD1           | MOD2   | MOD1            | MOD2   | MOD1              | MOD2  | MOD1    | MOD2   | MOD1    | MOD2   |        |        |       |       |        |        |       |       |
| Nanjing     | -15.71          | -17.15 | 31.32          | 32.19  | -48.65          | -41.71 | 66.30             | 63.81 | 50.44   | 37.89  | 90.04   | 82.58  | -17.66 | -17.33 | 35.82 | 35.80 | -22.16 | -21.87 | 35.71 | 35.83 |
| Wuxi        | 6.15            | 6.01   | 28.77          | 28.99  | -71.18          | -66.77 | 72.50             | 69.09 | 119.59  | 109.55 | 126.34  | 117.94 | -6.66  | -5.00  | 38.73 | 38.37 | -19.06 | -18.10 | 36.71 | 36.06 |
| Xuzhou      | 5.62            | 4.05   | 27.10          | 26.95  | -62.33          | -55.33 | 71.10             | 68.34 | 6.06    | -0.65  | 47.93   | 47.58  | 11.50  | 12.69  | 46.46 | 46.99 | -27.38 | -27.05 | 39.96 | 39.82 |
| Changzhou   | 7.59            | 5.98   | 29.54          | 28.24  | -64.78          | -57.10 | 69.13             | 63.92 | 104.63  | 89.35  | 114.08  | 101.28 | -4.93  | -4.32  | 41.28 | 41.19 | 1.90   | 2.31   | 38.28 | 38.20 |
| Suzhou      | -5.14           | -4.34  | 29.54          | 29.12  | -63.60          | -59.29 | 74.18             | 72.81 | 393.83  | 379.84 | 394.47  | 380.70 | 3.98   | 5.20   | 45.15 | 45.74 | 7.99   | 9.33   | 41.54 | 42.48 |
| Nantong     | 23.65           | 18.58  | 39.26          | 36.66  | -71.69          | -60.89 | 72.69             | 63.00 | 46.53   | 30.39  | 64.65   | 56.91  | -14.33 | -13.98 | 38.60 | 38.53 | -19.09 | -18.97 | 31.74 | 31.68 |
| Lianyungang | -9.16           | -11.30 | 30.66          | 32.36  | -17.96          | -8.56  | 60.84             | 62.55 | -35.60  | -39.40 | 51.73   | 51.83  | -27.29 | -26.79 | 46.90 | 46.65 | -51.93 | -51.62 | 56.32 | 56.29 |
| Huaian      | 44.97           | 43.09  | 57.33          | 59.02  | -56.08          | -45.68 | 63.07             | 60.17 | 26.09   | 12.88  | 68.09   | 60.97  | -30.44 | -31.56 | 46.77 | 47.67 | -24.65 | -24.46 | 49.29 | 49.85 |
| Yancheng    | 30.80           | 25.53  | 45.90          | 44.31  | -55.51          | -48.21 | 60.37             | 55.94 | -10.85  | -17.43 | 50.03   | 49.77  | -25.03 | -23.82 | 45.52 | 45.61 | -34.63 | -34.84 | 42.69 | 42.81 |
| Yangzhou    | 40.80           | 39.53  | 51.00          | 50.72  | -60.61          | -53.81 | 66.94             | 63.72 | 51.42   | 36.07  | 84.77   | 75.93  | -13.77 | -13.51 | 38.48 | 38.83 | -18.15 | -17.75 | 38.44 | 38.97 |
| Zhenjiang   | 24.80           | 16.18  | 41.69          | 37.99  | -62.25          | -42.71 | 66.48             | 58.59 | 138.43  | 95.69  | 153.20  | 120.48 | -5.83  | -5.70  | 41.42 | 41.70 | -18.65 | -18.73 | 50.16 | 50.60 |
| Taizhou     | 167.35          | 163.09 | 167.98         | 163.97 | -52.16          | -46.54 | 62.84             | 59.87 | 18.97   | 9.41   | 64.67   | 61.20  | -28.07 | -27.57 | 42.42 | 42.02 | -39.42 | -39.26 | 45.75 | 45.59 |
| Suqian      | -27.53          | -28.25 | 41.33          | 42.13  | -14.78          | -9.13  | 64.55             | 65.16 | -35.51  | -38.66 | 54.34   | 54.66  | -12.58 | -12.06 | 36.45 | 36.72 | -52.95 | -52.63 | 57.13 | 57.32 |
| Average     | 22.63           | 20.08  | 47.80          | 47.13  | -53.97          | -45.83 | 67.00             | 63.61 | 67.23   | 54.22  | 104.95  | 97.06  | -13.16 | -12.60 | 41.85 | 41.99 | -24.48 | -24.13 | 43.36 | 43.50 |
